# Supplementary material for: Cubic structure of the mixed halide perovskite CH3NH3PbI3−xClxvia thermal annealing
Source: Royal Society of Chemistry journal article supplement (doi:10.1039/c5ra16516d), 2015-01-01
Supplement: c5ra16516d1.pdf [file c5ra16516d1.pdf]

## Supplementary informations

### Cubic structure for mixed halide perovskite $\text{CH}_3\text{NH}_3\text{PbI}_{3-x}\text{Cl}_x$ by thermal annealing

Deying Luo<sup>a, d, #, \*</sup> Leiming Yu,<sup>a, #</sup> Hai Wang,<sup>a, \*</sup> Taoyu Zou,<sup>b</sup> Li Luo,<sup>b</sup> Zhu Liu<sup>b, \*</sup> and  
Zhenghong Lu<sup>b, c</sup>

---

<sup>a</sup> *Key Laboratory of Yunnan Provincial Higher Education Institutions for Organic Optoelectronic Materials and Devices, Kunming University, Kunming 650214, P.R. China*

<sup>b</sup> *Department of physics, Yunnan Key laboratory of Micro/Nano-Materials and Technology, Yunnan University, Kunming, Yunnan 650091, P.R. China*

<sup>c</sup> *Department of Materials Science and Engineering, University of Toronto, Toronto, Ontario M5S 3E4, Canada*

<sup>d</sup> *Present address: Institute of Modern Optics, School of Physics, Peking University, Beijing, 100871, P.R. China.*

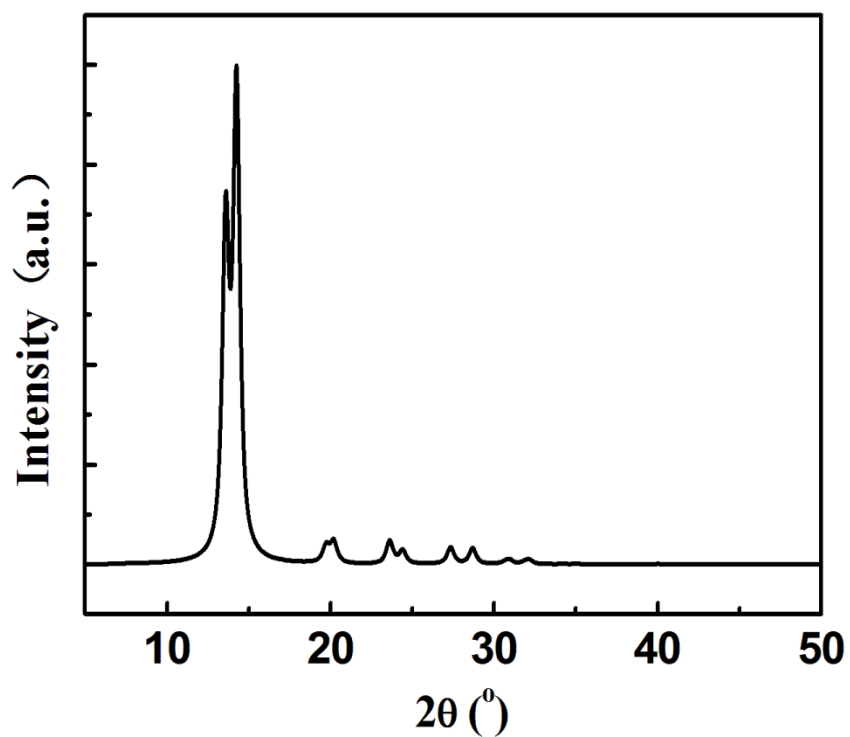

Fig. S1 The calculated XRD of  $\text{MAPbI}_{3-x}\text{Cl}_x$  perovskite with tetragonal structure using a Mercury software, and crystal structure established basing on the regarding atomic coordination<sup>1,2</sup>.

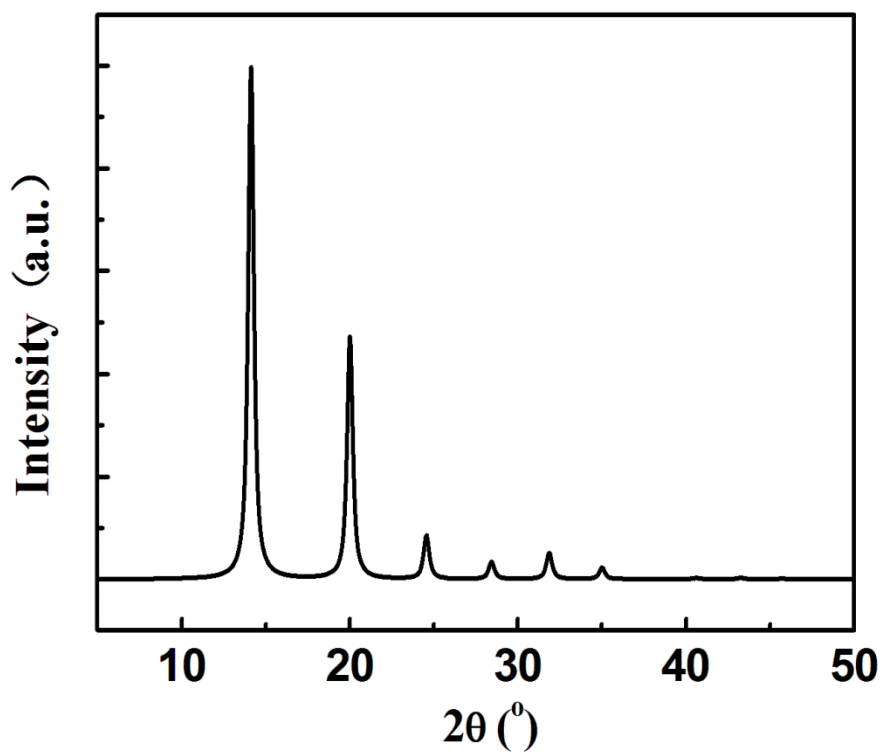

Fig. S2 The calculated XRD of MAPbI<sub>3-x</sub>Cl<sub>x</sub> perovskite with cubic structure using a Mercury software, and crystal structure established basing on the regarding atomic coordination.

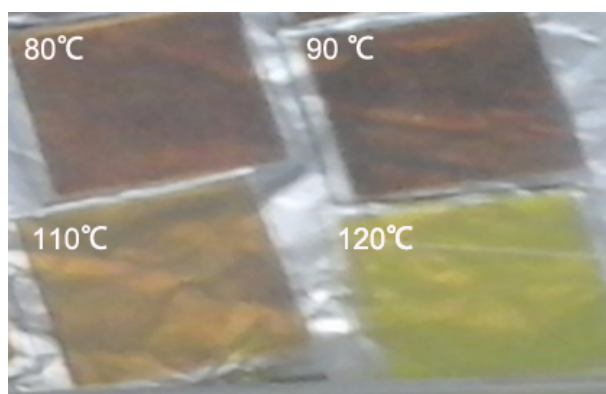

Fig S3. Photographs of samples undergo the different thermal annealing at 80°, 90°, 110° and 120°.

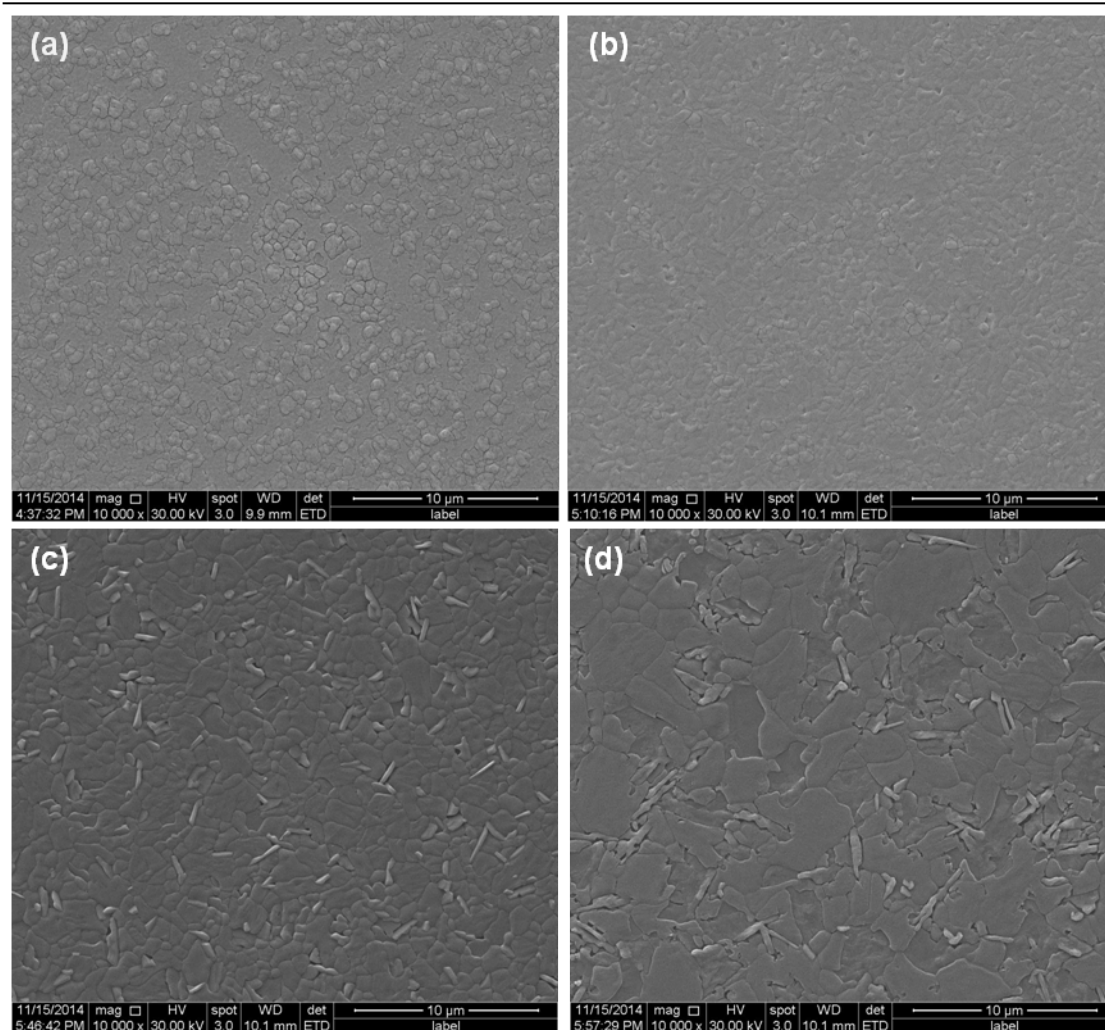

Fig S4. SEM images (a-d) of MAPbI<sub>3-x</sub>Cl<sub>x</sub> perovskite layer before and after thermal annealing at 90°, 100° and 110°.

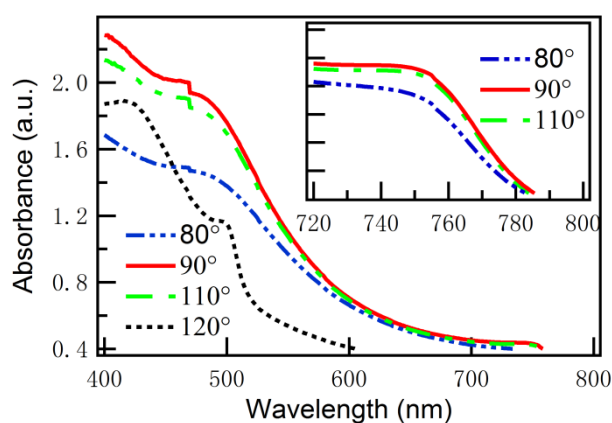

Fig S5. UV-visible light absorption of MAPbI<sub>3-x</sub>Cl<sub>x</sub> growth on the FTO substrates through varied thermal-annealing treatments

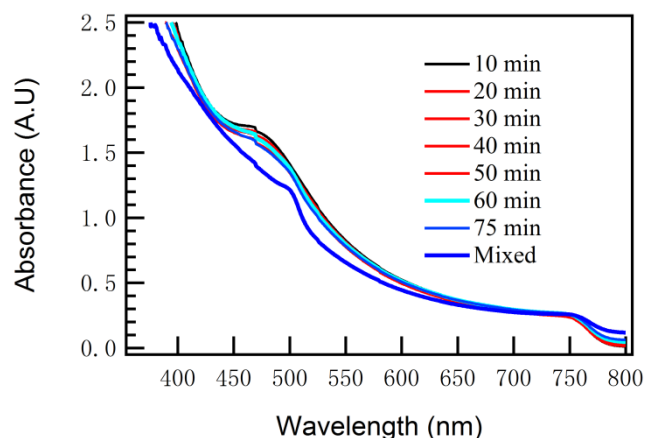

Fig S6. UV-visible light absorption of MAPbI<sub>3-x</sub>Cl<sub>x</sub> growth on the FTO substrates though varied thermal-annealing treatment from 0 to 75 minutes at 100°.

Table. S1. EDX datas of as-grow MAPbI<sub>3-x</sub>Cl<sub>x</sub> mixed halide perovskite

| Elements   | Weight (%)   | Atom (%)    |
|------------|--------------|-------------|
| C K        | 1.18         | 4.05        |
| O K        | 9.05         | 23.31       |
| SiK        | 32.8         | 48.11       |
| MoL        | 0.85         | 0.37        |
| <b>ClK</b> | <b>0.11</b>  | <b>0.13</b> |
| InL        | 11.57        | 4.15        |
| SnL        | 2.46         | 0.85        |
| CaK        | 10.9         | 11.2        |
| <b>I L</b> | <b>11.51</b> | <b>3.74</b> |
| AuL        | 13.49        | 2.82        |
| <b>PbL</b> | <b>6.06</b>  | <b>1.21</b> |

1. C. C. Stoumpos, C. D. Malliakas and M. G. Kanatzidis, *Inorganic chemistry* **52** (15), 9019 (2013).
2. J. Feng and B. Xiao, *The Journal of Physical Chemistry Letters* **5** (7), 1278 (2014).
